# Supplementary material
Source: publisher site journal article supplement (https://www.dovepress.com/article/supplementary_file/499686/499686_proof.docx)
Supplement: Supplementary file 1 [file 499686_proof.docx]

**Supplementary Table 1.** Selection criteria for study enrollment

| **Selection criteria** |
| --- |
| Inclusion criteria   1. Patients aged 40 years or older. 2. Patients diagnosed with chronic obstructive pulmonary disease (COPD). 3. Patients who provided consent to participate in the study. 4. Patients who had been receiving triple therapy with multiple inhalers. |
|  |
| Exclusion criteria   1. Patients who are potentially pregnant. 2. Patients with a life expectancy of less than 6 months or those with deteriorating health conditions. 3. Patients with unstable COPD who experienced exacerbations within the past 4 weeks. 4. Patients with other diseases or mental disorders. 5. Patients with hypersensitivity to steroids, anticholinergic or muscarinic agents, or lactose/lactose proteins. 6. Patients requiring long-term (more than 4 weeks) oral steroid use for conditions other than COPD. 7. Patients currently participating in interventional clinical trials. |

Abbreviations: COPD, chronic obstructive pulmonary disease

**Supplementary Table 2.** Additional baseline patient demographics and characteristics (N=107)

| **Characteristics** | **Baseline** | | |
| --- | --- | --- | --- |
| **Total** | **n** |  |  |
| **Smoking history at enrolment,** n (%) |  |  |  |
| Never smoker |  | 23 | (21) |
| Current smoker |  | 32 | (30) |
| Ex- smoker |  | 52 | (49) |
| **FEV1 pred (%),** n, (%) |  |  |  |
| GOLD 1 (FEV1% predicted ≥80%) |  | 12 | (11) |
| GOLD 2 (FEV1% predicted <80% and ≥50%) |  | 47 | (44) |
| GOLD 3 (FEV1% predicted <50% and ≥30%) |  | 32 | (30) |
| GOLD 4 (FEV1% predicted <30%) |  | 16 | (15) |
| **mMRC dyspnea scale score,** n, Mean, ± SD* |  | 1.84 | ± 0.74 |
| **mMRC dyspnea scale score in baseline**,n (%) |  |  |  |
| 0 |  | 1 | (1) |
| 1 |  | 35 | (33) |
| 2 |  | 50 | (47) |
| 3 |  | 20 | (19) |
| 4 |  | 0 | - |
| **Respiratory disease history & Comorbid diseases**, n (%)** |  |  |  |
| Bronchiectasis |  | 18 | (17) |
| Chronic bronchitis |  | 31 | (29) |
| Emphysema |  | 39 | (37) |
| Pulmonary fibrosis |  | 17 | (16) |
| Previous history of TB |  | 14 | (13) |
| Measles |  | 2 | (2) |
| Whooping cough |  | 1 | (1) |
| Pneumonia |  | 5 | (5) |
| Bronchial asthma |  | 16 | (15) |
| Allergic rhinitis |  | 1 | (1) |
| Atopic dermatitis |  | 1 | (1) |
| Drug allergy |  | 0 | (0) |

Abbreviations: SD, standard deviation; TB, Tuberculosis; FEV1, forced expiratory volume in 1; FVC, forced vital capacity; GOLD criteria based on Global initiative for Chronic Obstructive Lung Disease (GOLD) 2022 report43.; *. Data captured from 106 subjects; **. Some subjects recorded more than one disease

**Supplementary Table 3.** CAT responders at week 24 (N = 91)

| **N (%)** |  |  |
| --- | --- | --- |
| **Responder** | 48 | 52.7% |
| Non-Ellipta MITT | 29 | 53.7% |
| Ellipta MITT | 19 | 51.4% |
| **Non-Responder** | 43 | 47.3% |
| Non-Ellipta MITT | 25 | 46.3% |
| Ellipta MITT | 18 | 48.6% |
|  | **Crude OR (95% CI)** | **Adjusted OR (95% CI)** |
| **Responder** |  |  |
| Ellipta MITT | 1.00 [reference] | 1.00 [reference] |
| Non-Ellipta MITT | 1.10 (0.48-2.54) | 1.23 (0.47-3.21) |

Abbreviation: CI, confidence interval; OR odds ratio; Proportion of COPD Assessment Test (CAT) responders at week 24. Response is defined as a CAT score ≥2 units below baseline.

**
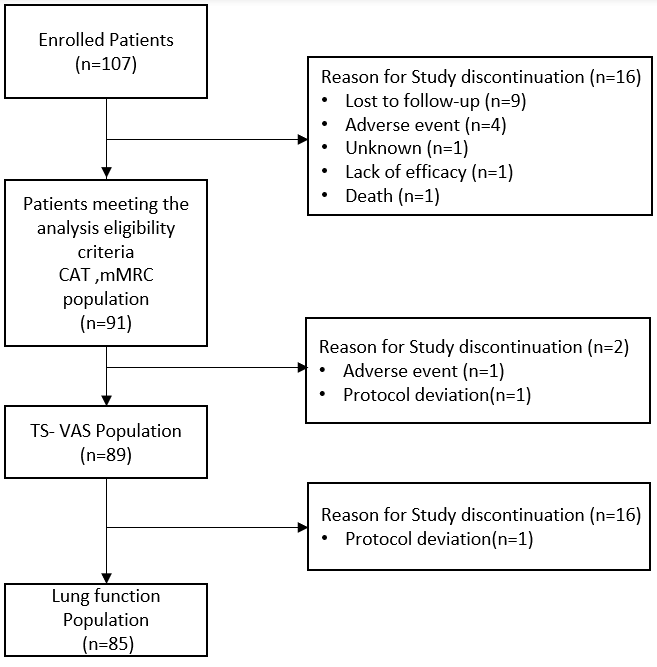
**

**Supplementary Figure 1.** Overview of enrolled patients.
